# Supplementary material for: The OsCBL8–OsCIPK17 Module Regulates Seedling Growth and Confers Resistance to Heat and Drought in Rice
Source: MDPI journal article supplement (doi:10.3390/ijms232012451), 2022-10-18
Supplement: s1 [file s1]

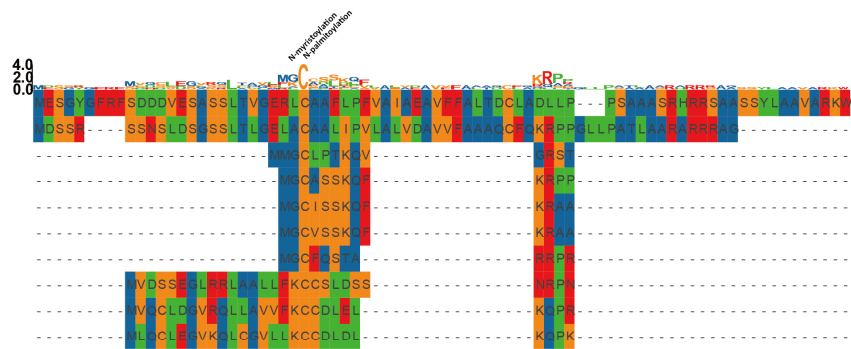

### EF-hand 1

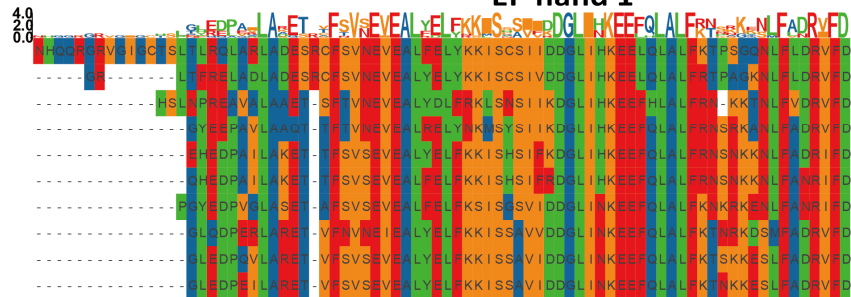

### EF-hand 2

### EF-hand 3

### EF-hand 4

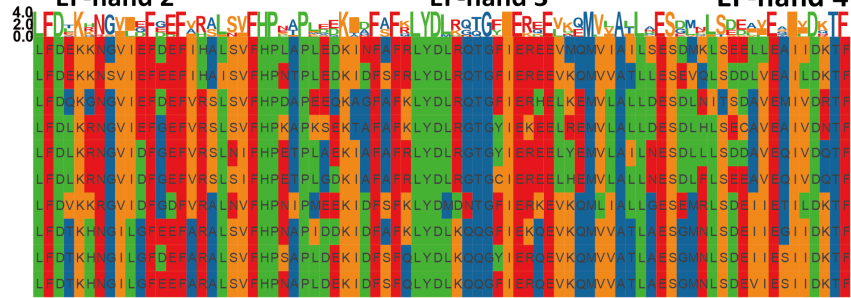

### FPSF motif

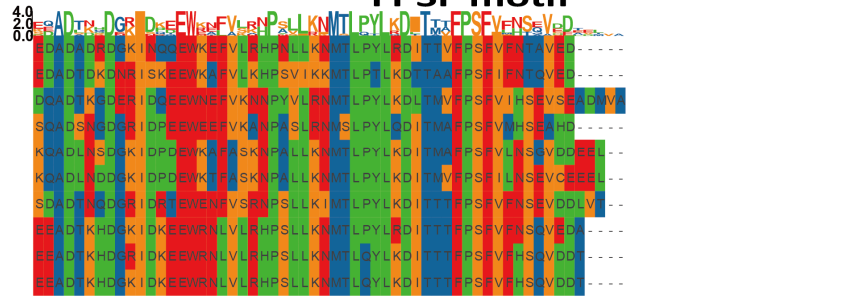

Supplemental Figure. S1. Multiple sequence alignment of rice CBL protein with conserved motifs. Myristoylation sites and palmitoylation sites are shown at the N-terminal. FPSF motif is shown at the C-terminal. There are four EF-hand domains in the middle part of the proteins.

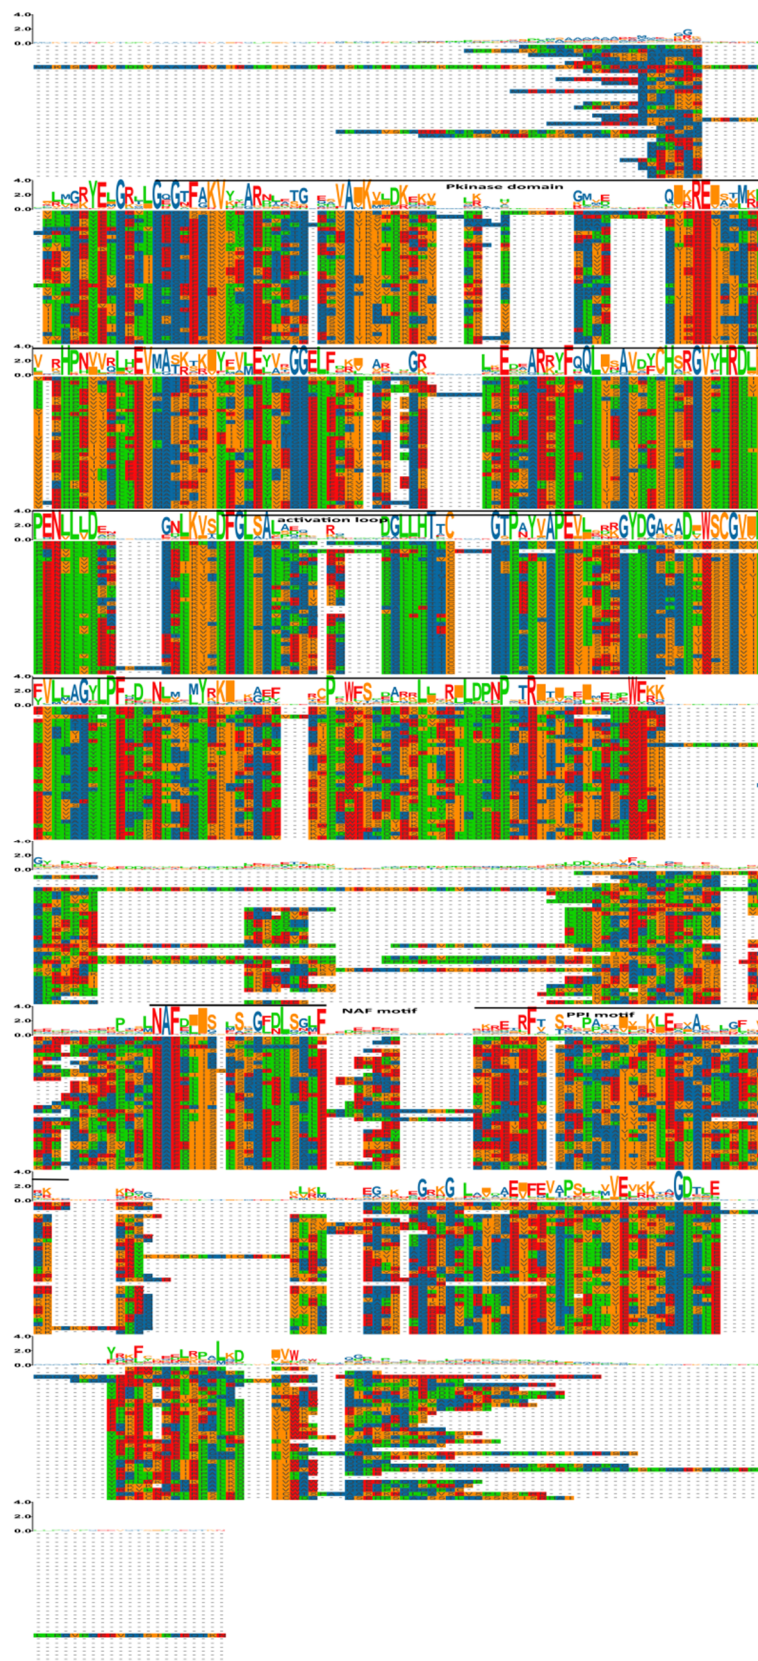

**Supplemental Figure. S2. Multiple sequence alignment of rice CIPK protein with conserved motifs.** The kinase domain is displayed at the N-terminal and has a conserved activation loop. The NAF motif and PPI motif are displayed at the c-terminal.

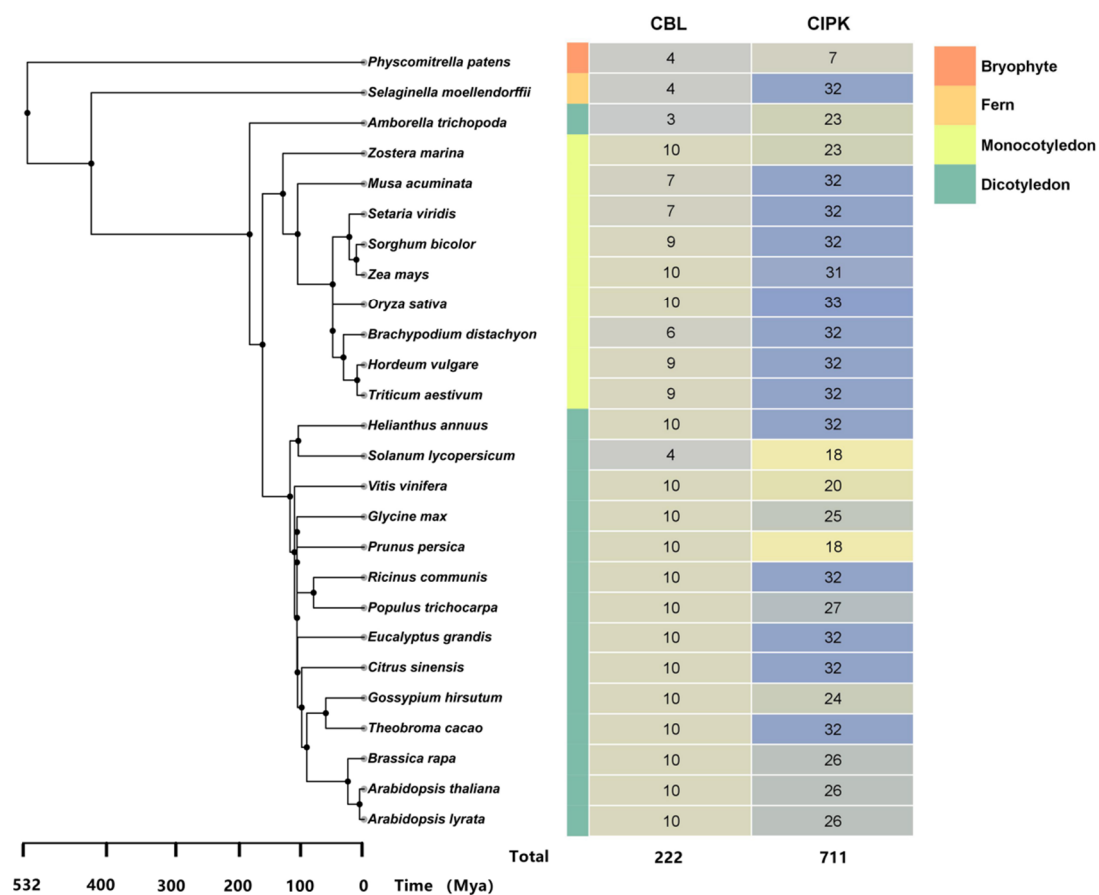

**Supplemental Figure. S3. Statistics of CBL and CIPK in different plant species.** The phylogenetic tree on the left shows the divergence time of 26 different species selected from monocotyledons, dicotyledons, bryophyte and ferns. The heat map on the right shows the number of members from *CBL* and *CIPK* gene families in different plants.





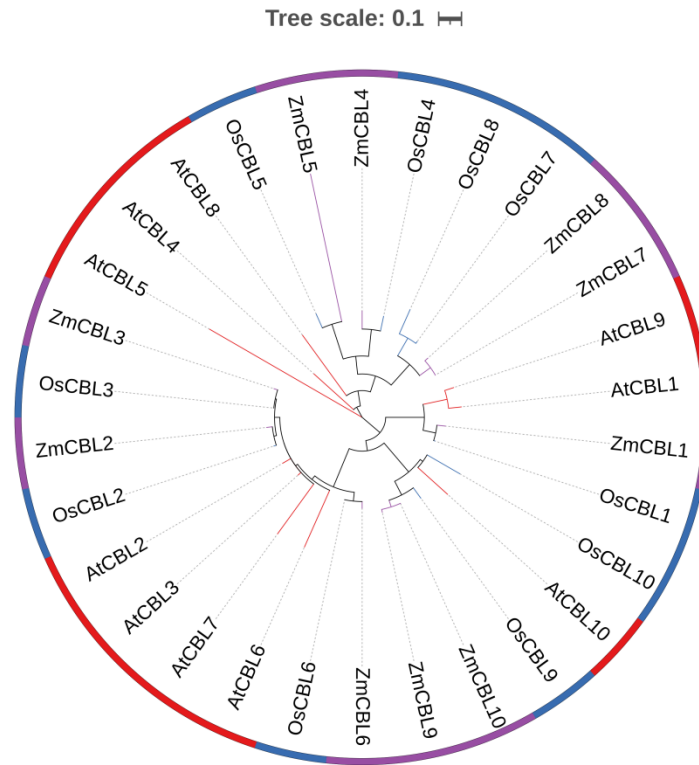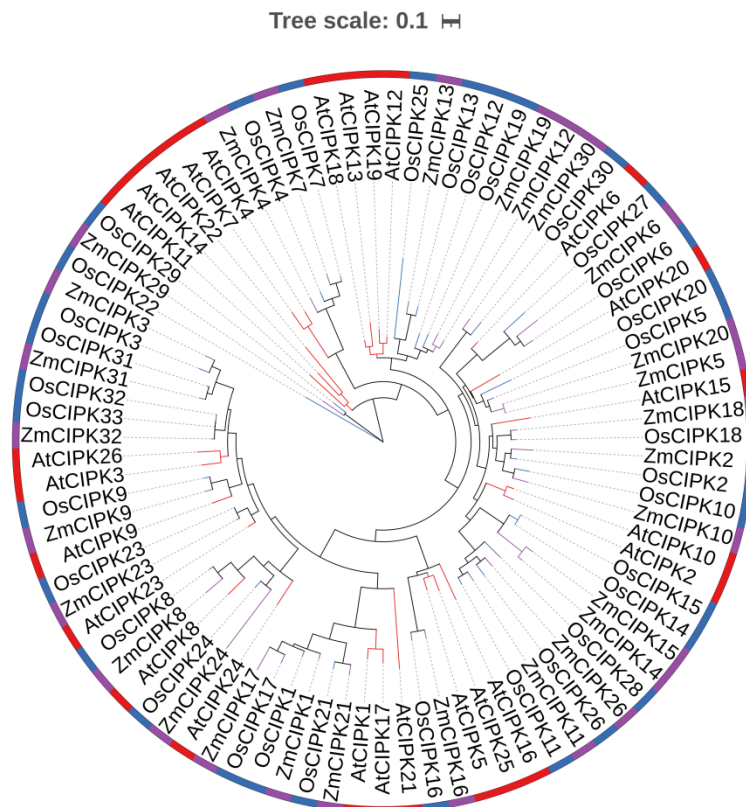

**Supplemental Figure. S5. Bayesian inference gene tree topology for the *CBL* and *CIPK* gene family.** Red for Arabidopsis, blue for rice and purple for corn.

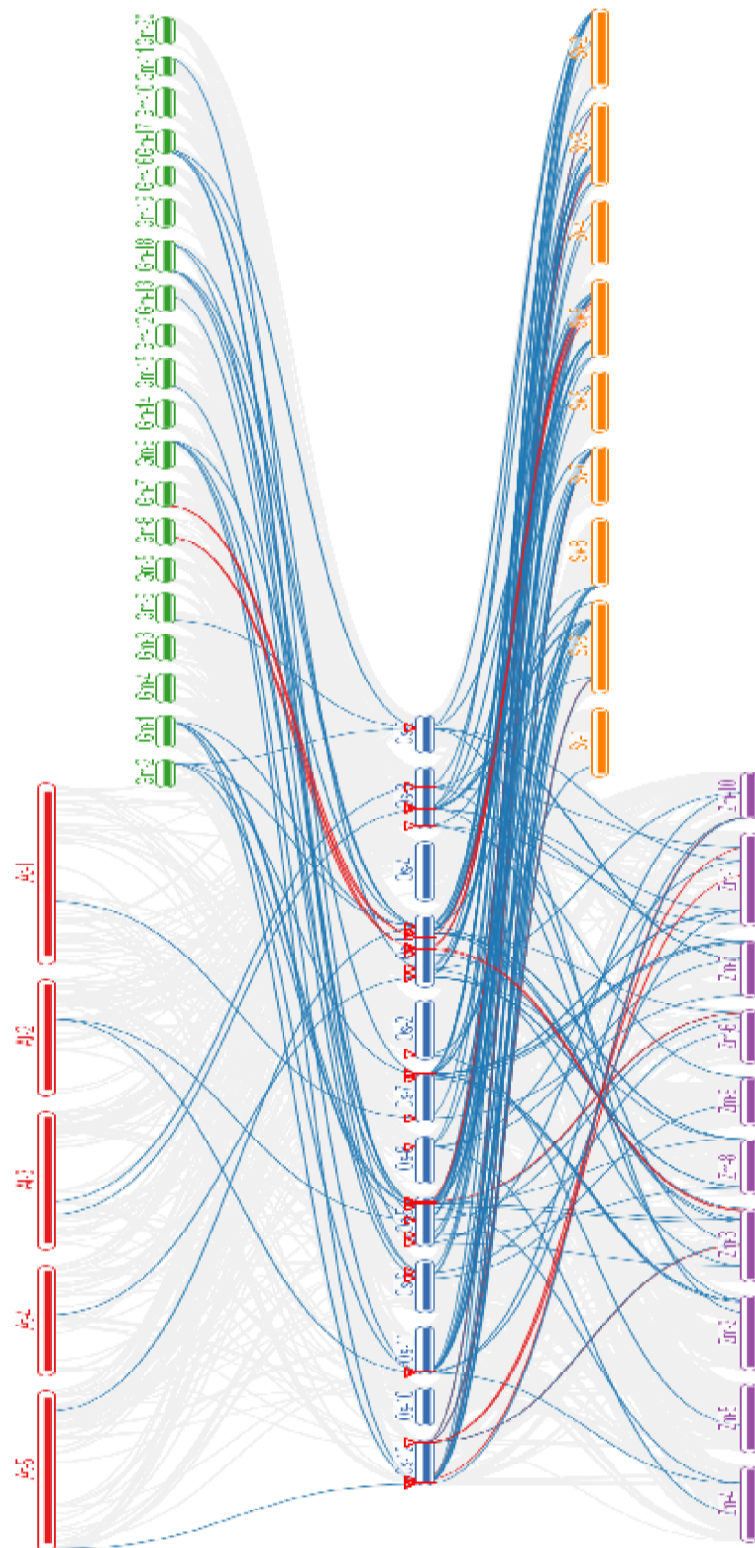

**Supplemental Figure. S6. Syntenic relationships of the *CBL* and *CIPK* gene family in rice (*Os*), maize (*Zm*), setaria (*Sv*), soybean (*Gm*), and *Arabidopsis* (*At*).** Red lines represent the *CBL* family, and blue lines represent the *CIPK* family. Red triangles indicate the position of *CBL* and *CIPK* genes on the rice chromosome.

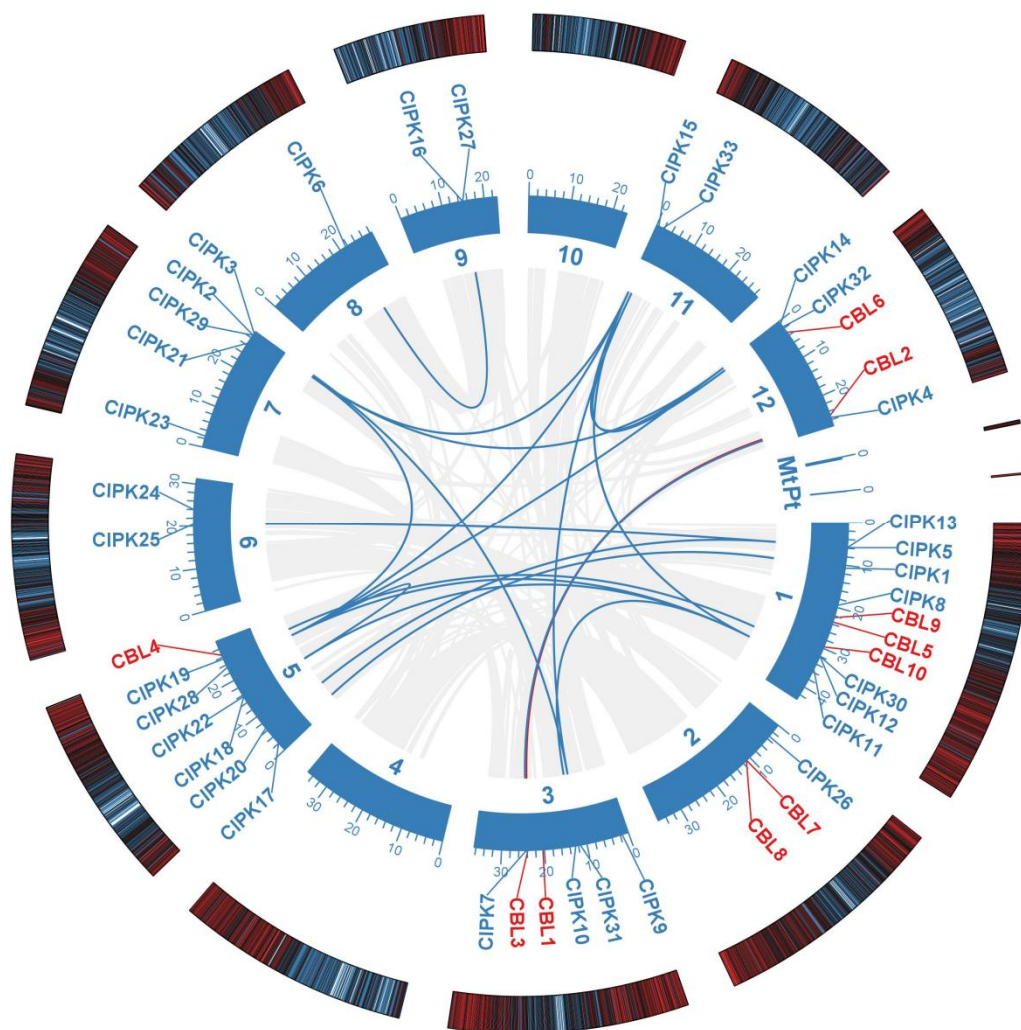

**Supplemental Figure. S7.** Syntenic analysis of the *CBL* and *CIPK* gene families in rice. Gene density is also added to the graph. Red indicates high gene density, while blue is the opposite.

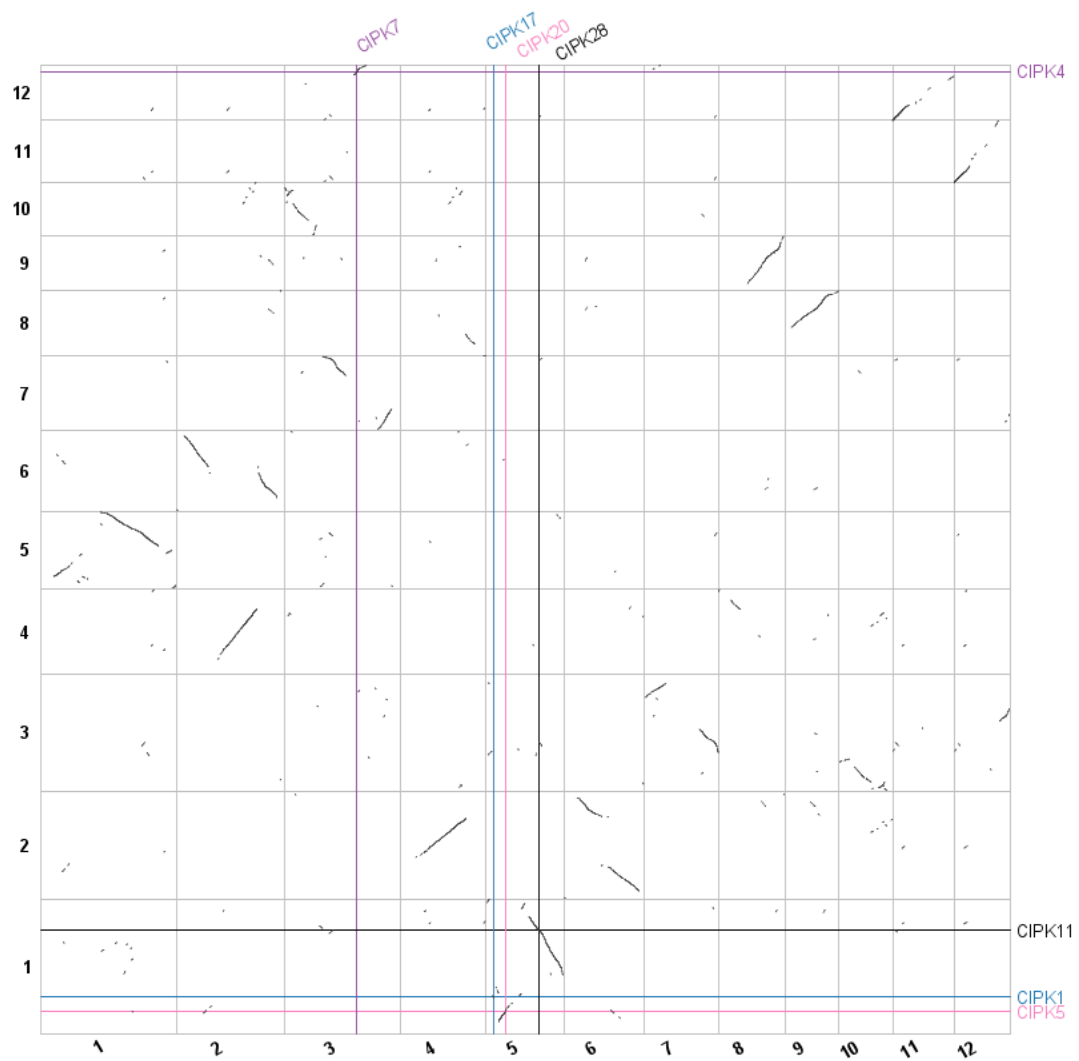

Supplemental Figure. S8. Dot plot image of rice genome-wide synteny. Gene-pairs experiencing WGD are represented by lines of the same color.





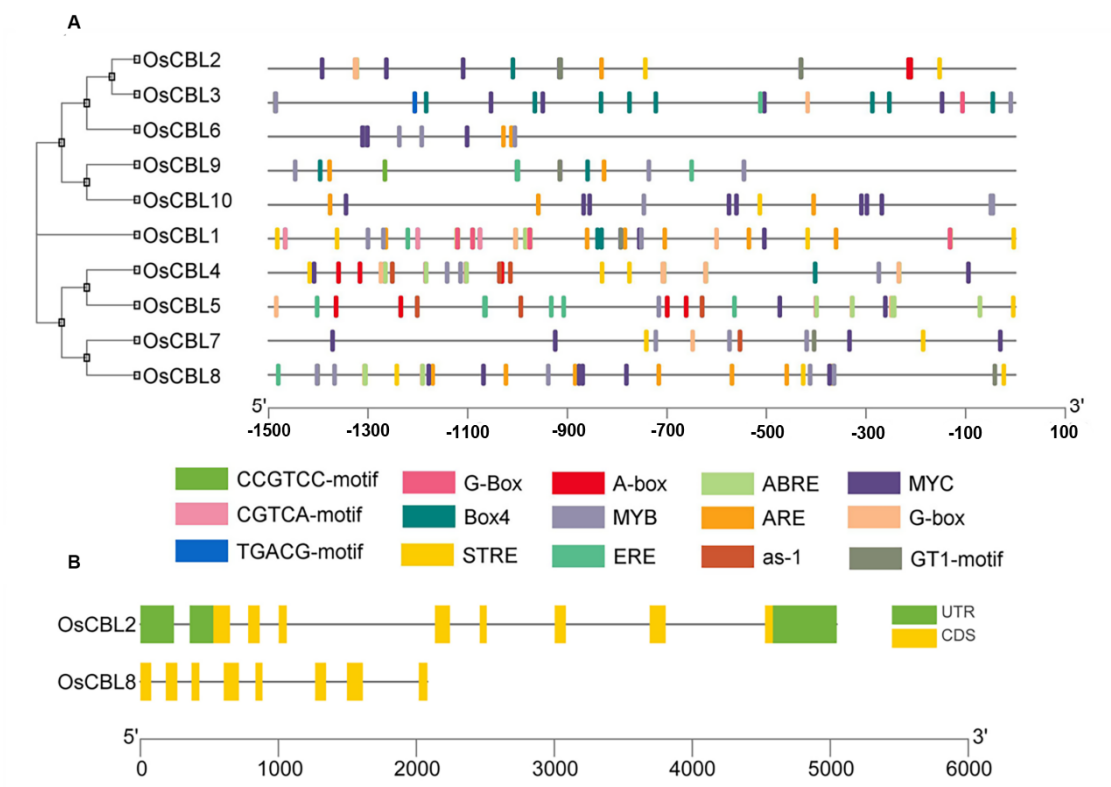

**Supplemental Figure. S10. Promoter analysis of rice *CBL* gene family and gene structure display of *OsCBL2* and *OsCBL8*.** (A) Prediction of promoter distribution in 1500 bp upstream region of *OsCBL* with maximum-likelihood gene tree topology. (B) Gene structure display of *OsCBL2* and *OsCBL8*.

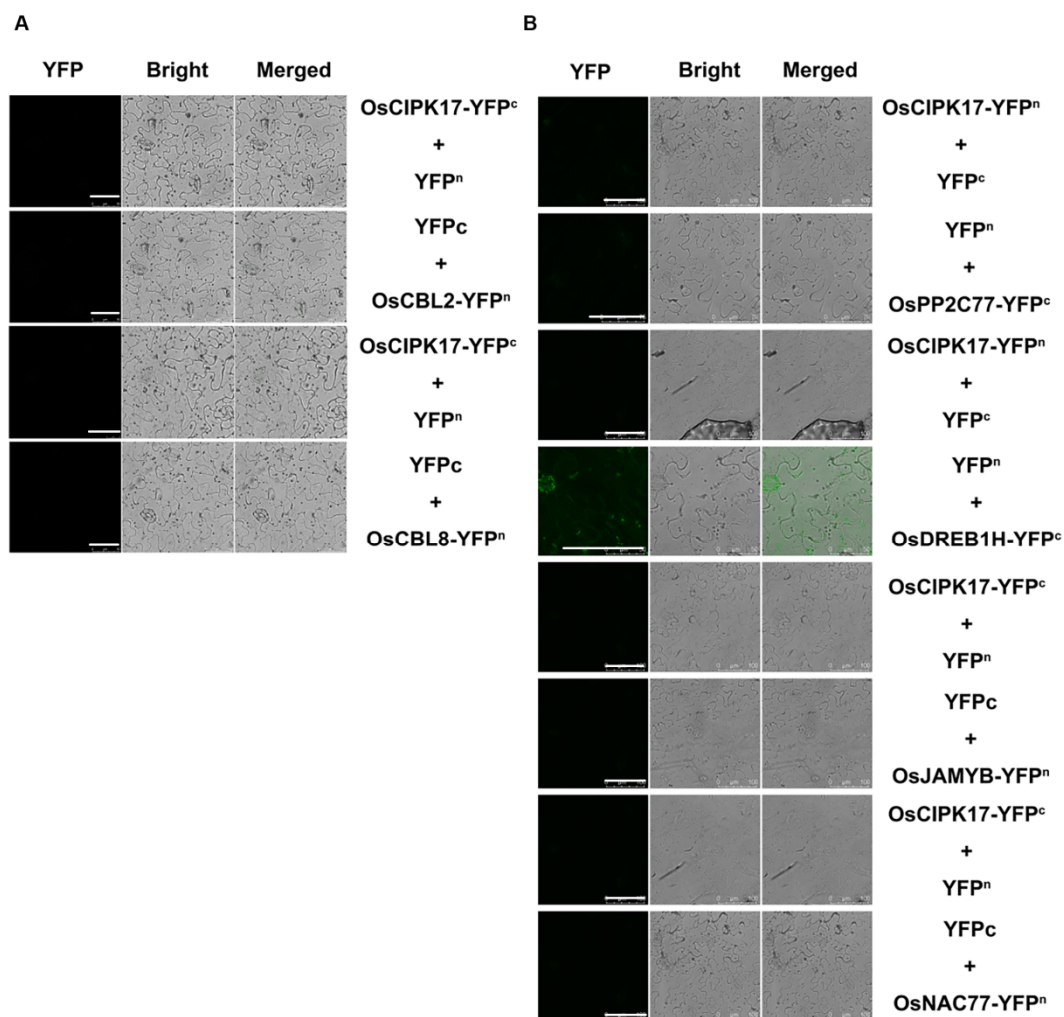

**Supplemental Figure. S11. Images of BIFCcontrols.** (A) Controls of firuge 1B. Bar = 100  $\mu$ m. (B) Controls of firuge 6F. Bar = 100  $\mu$ m.

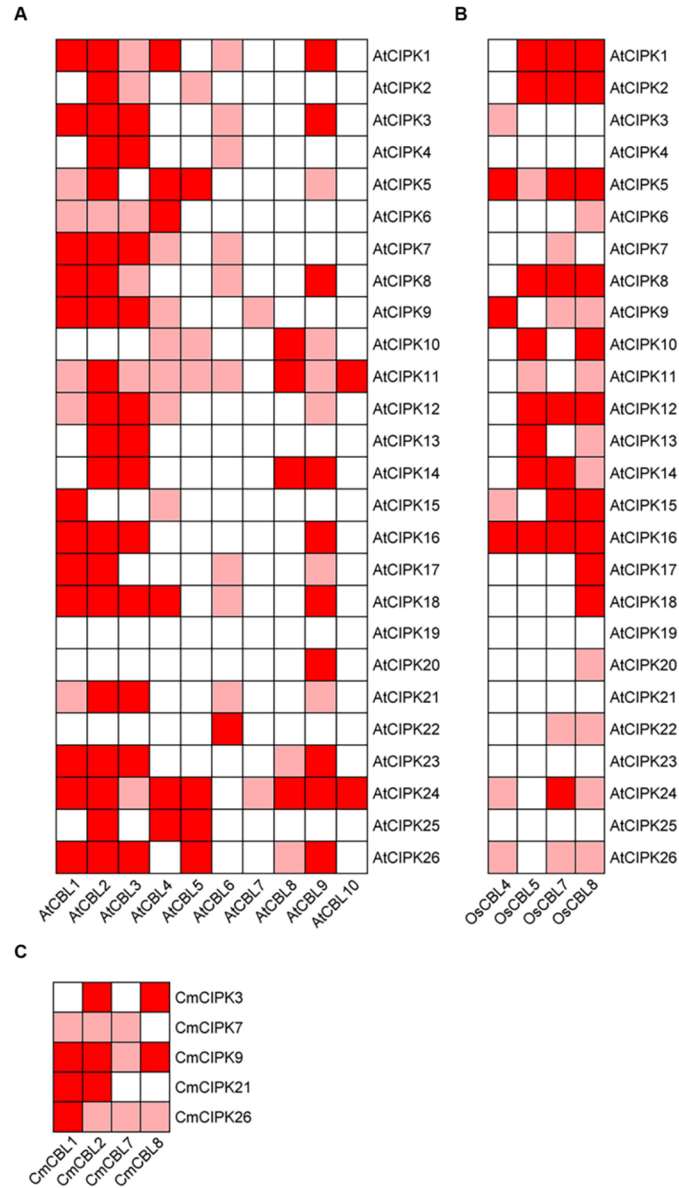

**Supplemental Figure. S12. Specific interaction between CBL and CIPK.** (A) The figure shows the interaction between CBL and CIPK in *Arabidopsis*. Deep red indicates strong interaction, light red indicates weak interaction, and white indicates no interaction. (B) The figure shows the interaction between CBL from rice and CIPK from *Arabidopsis*. Deep red indicates strong interaction, light red indicates weak interaction, and white indicates no interaction. (C) The figure shows the interaction between CBL and CIPK in pumpkin. Deep red indicates strong interaction, light red indicates weak interaction, and white indicates no interaction.



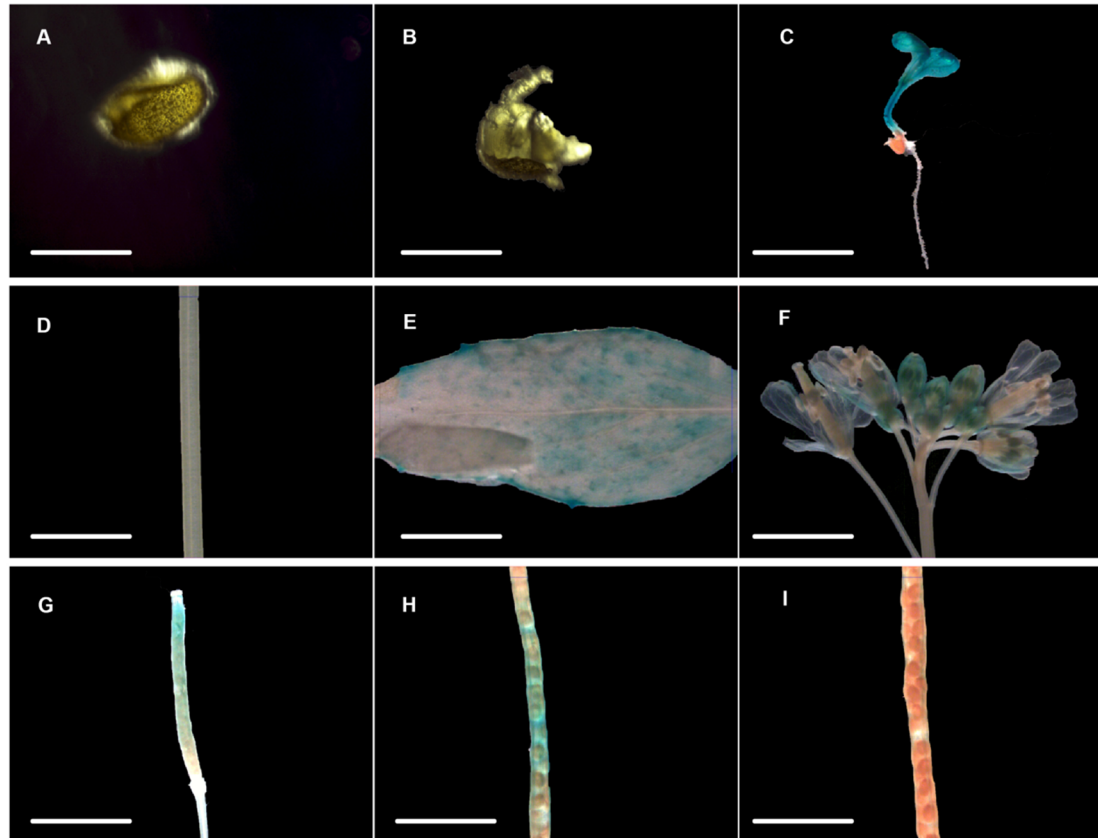

**Supplemental Figure. S13.** GUS tissue staining of *Arabidopsis thaliana* transformed with the promoter of *OsCBL8*. A. Seed; B. Seed embryo; C. One-week-old seedlings; D. Stems of one-month-old plants; E. Stem leaf of one-month-old plants; F. Flowers of one-month-old plants; G, H, I. pods of different parts of one-month-old plants. The scale of seed and embryo is 2 mm; The rest of the scales are 200  $\mu$ m.

A

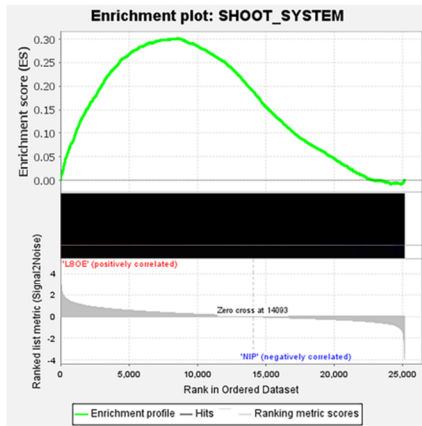

B

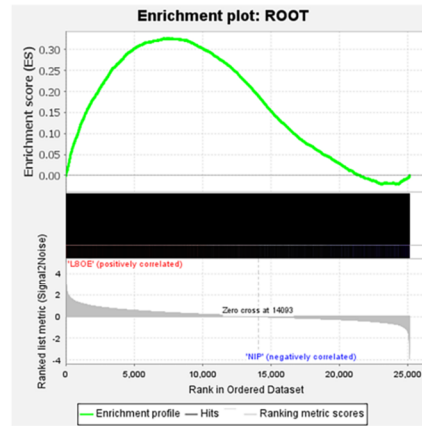

C

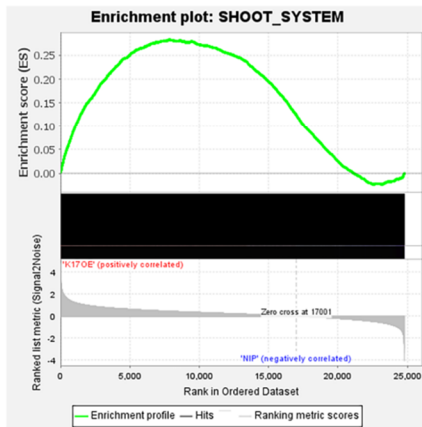

D

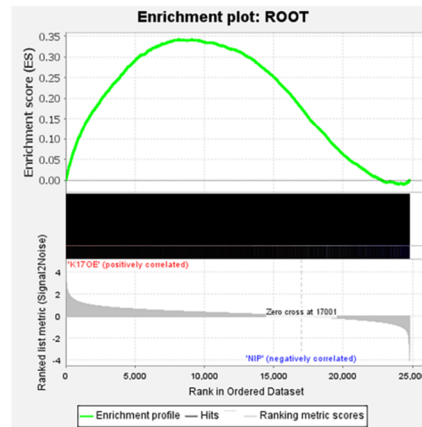

**Supplemental Figure. S14. Gene Set Enrichment Analysis based on PO database.** (A) GSEA in shoot system for *OsCBL8* overexpression lines. Enrichment Score (ES) = 0.30162418, Normalized Enrichment Score (NES) = 1.0771977, p-value = 0, q-value = 0. (B) GSEA in root for *OsCBL8* overexpression lines. ES = 0.3265098, NES = 1.1673537, p-value = 0, q-value = 0. (C) GSEA in shoot system for *OsCIPK17* overexpression lines. ES = 0.28341126, NES = 1.093442, p-value = 0, q-value = 0. (D) GSEA in root for *OsCIPK17* overexpression lines. ES = 0.34221265, NES = 1.3186401, p-value = 0, q-value = 0.

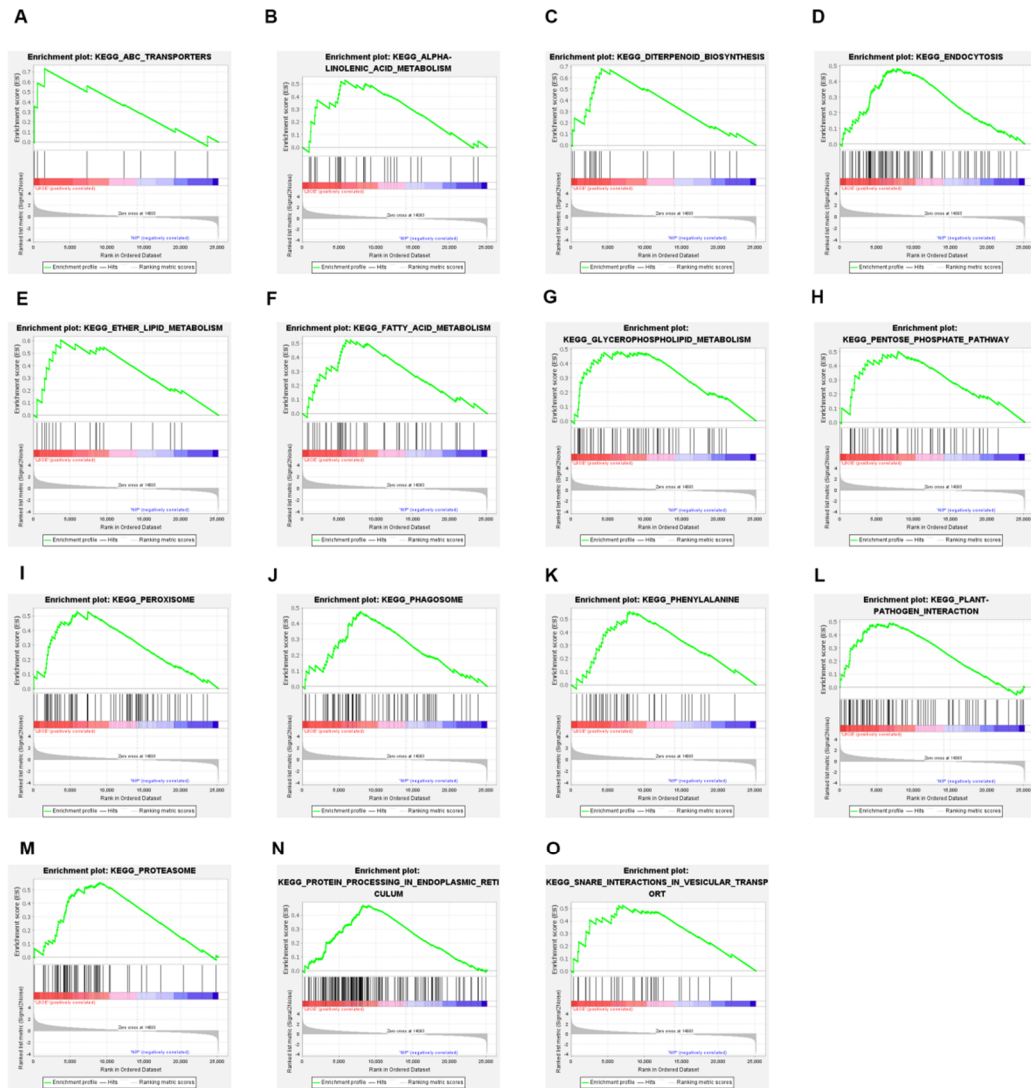

Supplemental Figure. S15. Gene Set Enrichment Analysis for *OsCBL8* overexpression lines based on Kyoto Encyclopedia of Genes and Genomes (KEGG) database. The specific data of ES, NES, p-value and q-value are shown in the table (Supplemental Table S2).

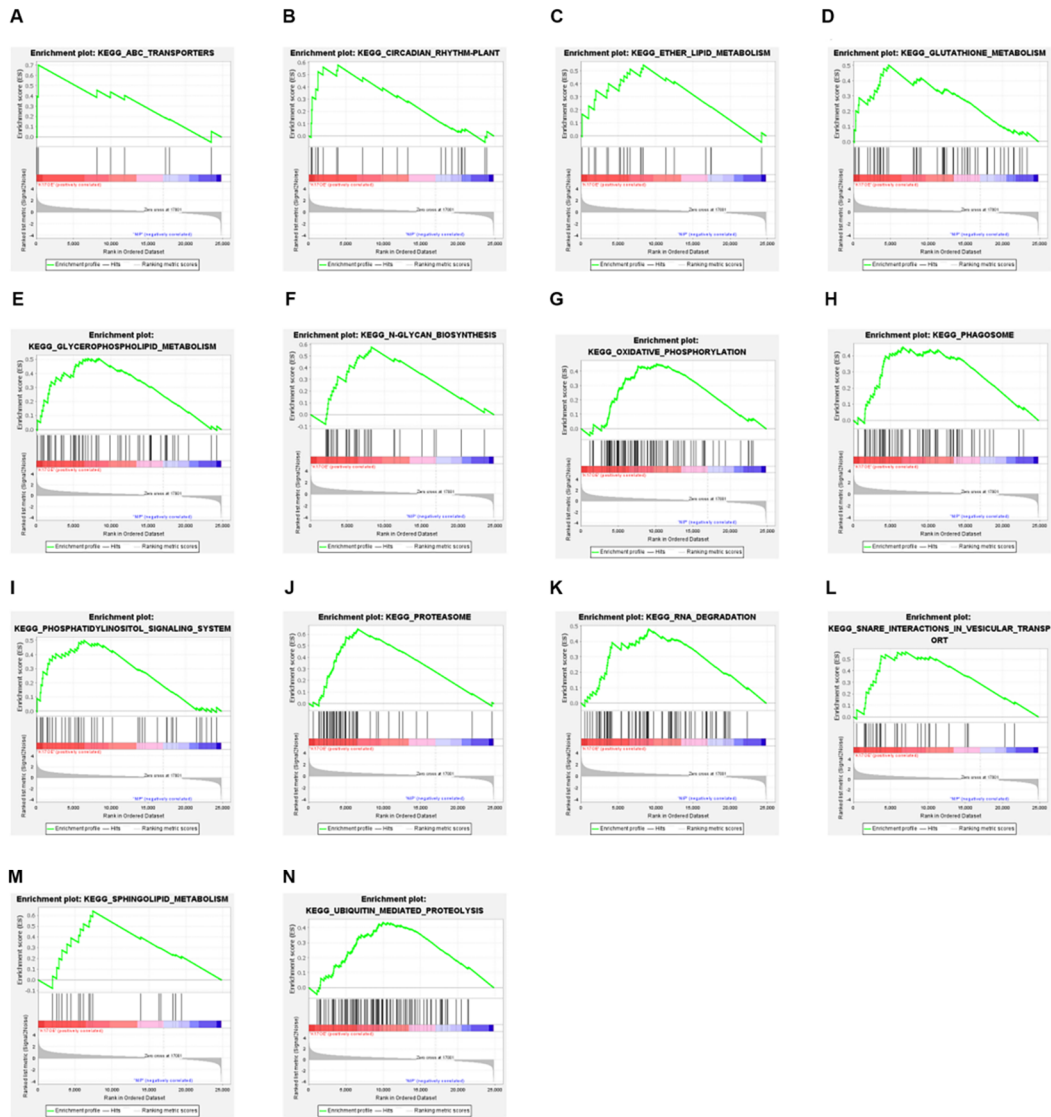

**Supplemental Figure. S16. Gene Set Enrichment Analysis for *OsCIPK17* overexpression lines based on KEGG database.** The specific data of ES, NES, p-value and q-value are shown in the table (Supplemental Table S3).



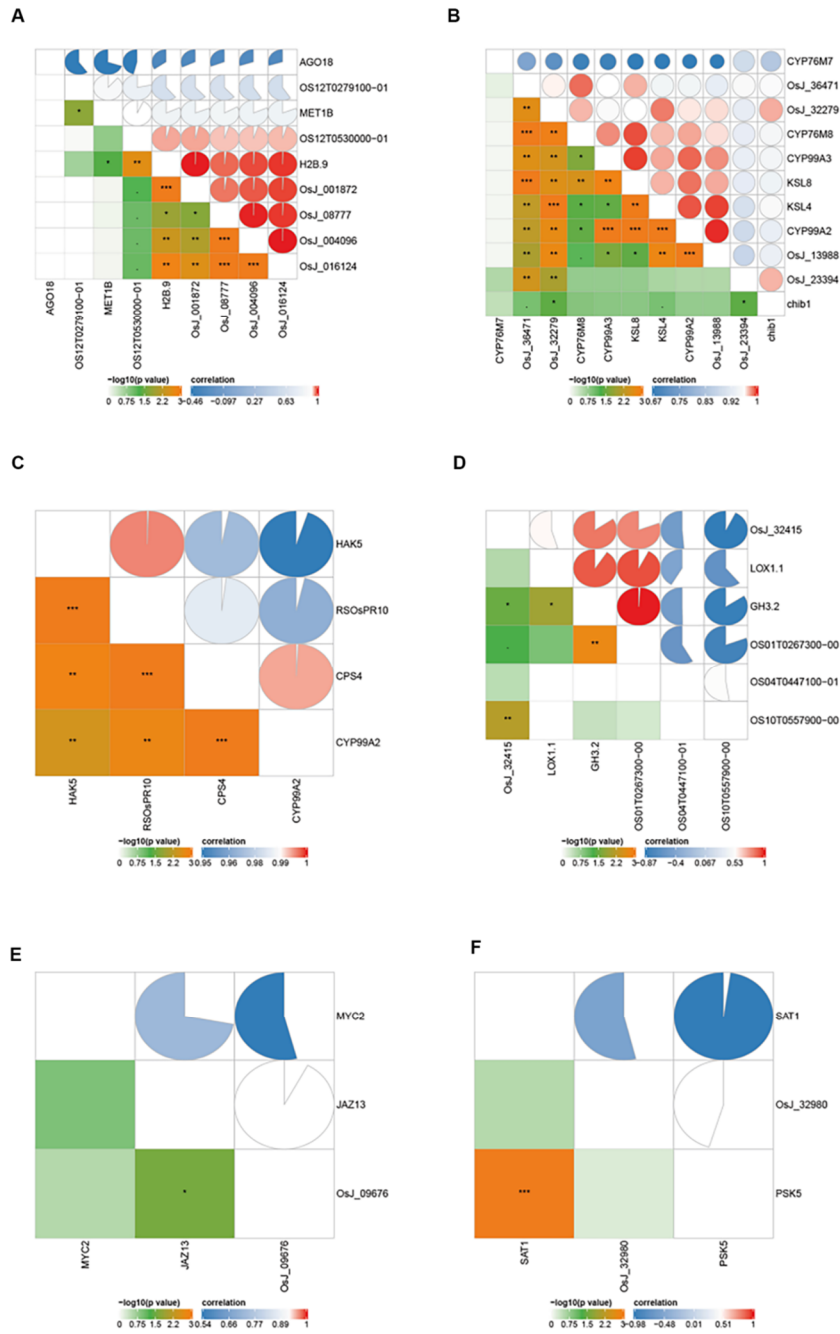

**Supplemental Figure. S17. Correlation analysis of sub-modules in the PPI network.** (A), (B), (C) correspond to sub-modules 1, 2 and 3 after overexpression of *OsCBL8*, respectively. (D), (E), (F) correspond to sub-modules 1, 2 and 3 after overexpression of *OsCIPK17*, respectively. \* $P < 0.05$ , \*\* $P < 0.01$ , \*\*\* $P < 0.001$ .

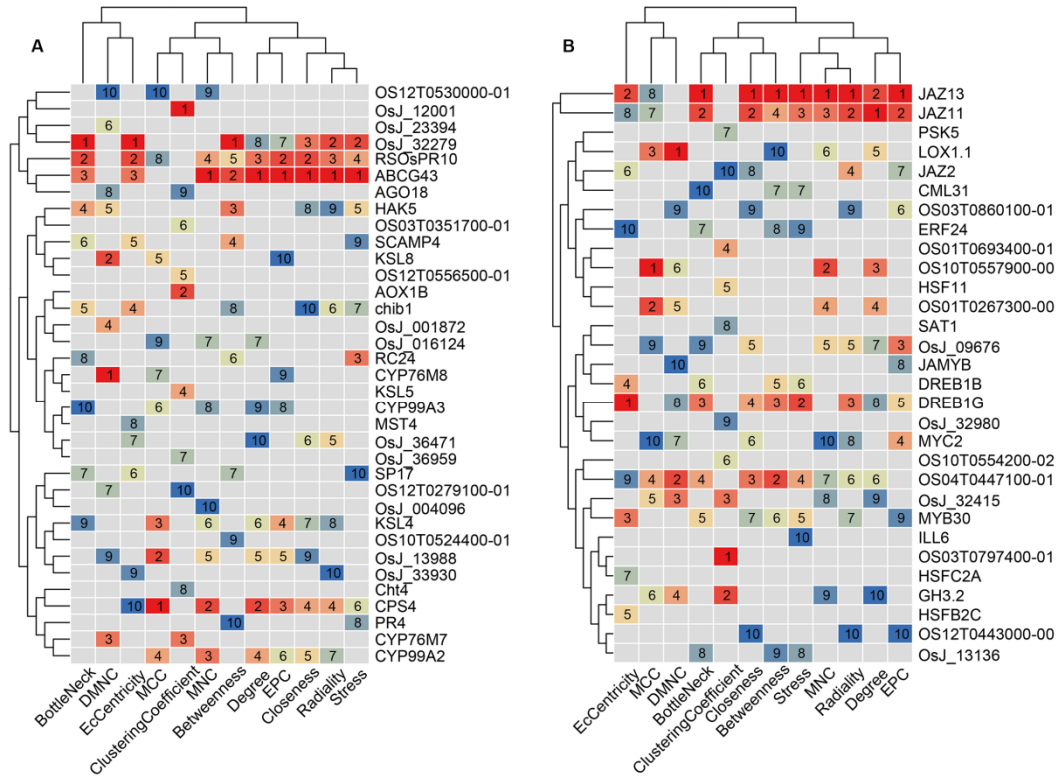

**Supplemental Figure. S18. Hub genes selected by different methods.** (A) and (B) Hub genes generated from DEGs of lines overexpressing *OsCBL8* and *OsCIPK17*. They are ranked according to their scores. The higher the score, the higher the ranking (red). Only the top ten genes are show

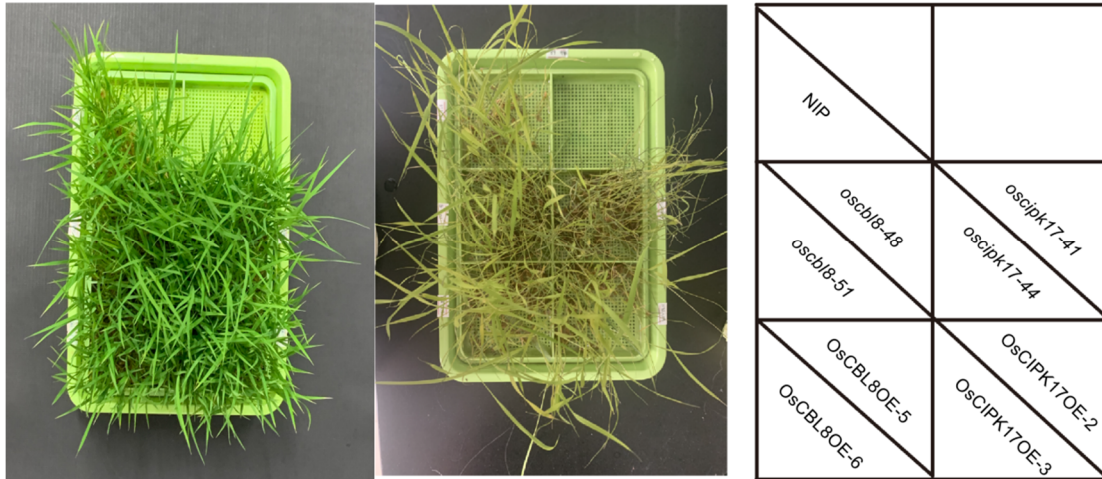

**Supplemental Figure. S19. Phenotype of 2-week-old seedlings after 9 days of high temperature treatment.** The left is the plant under normal conditions, the middle is the plant under high temperature treatment, and the right is the schematic diagram of plant planting location.

A

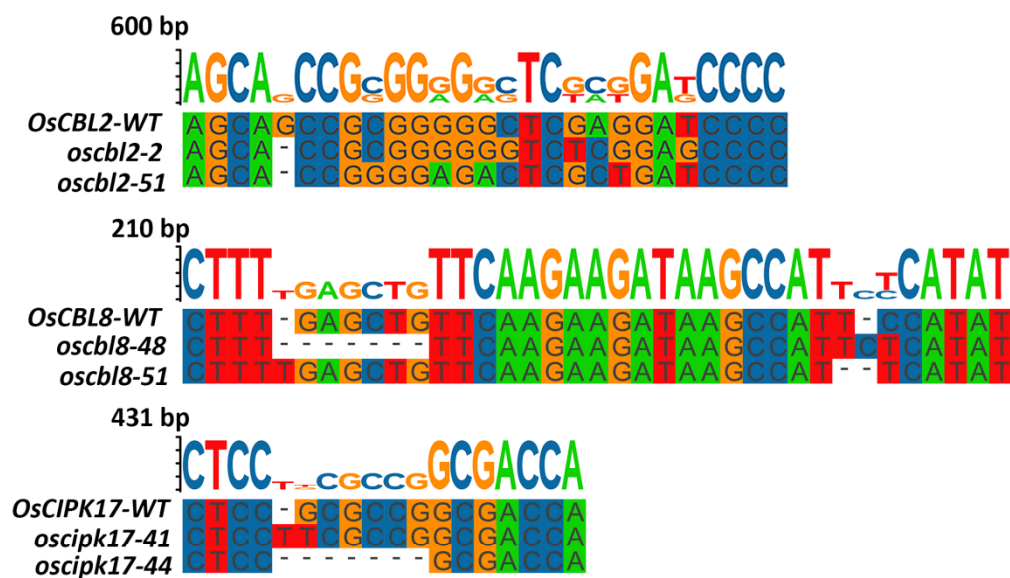

B

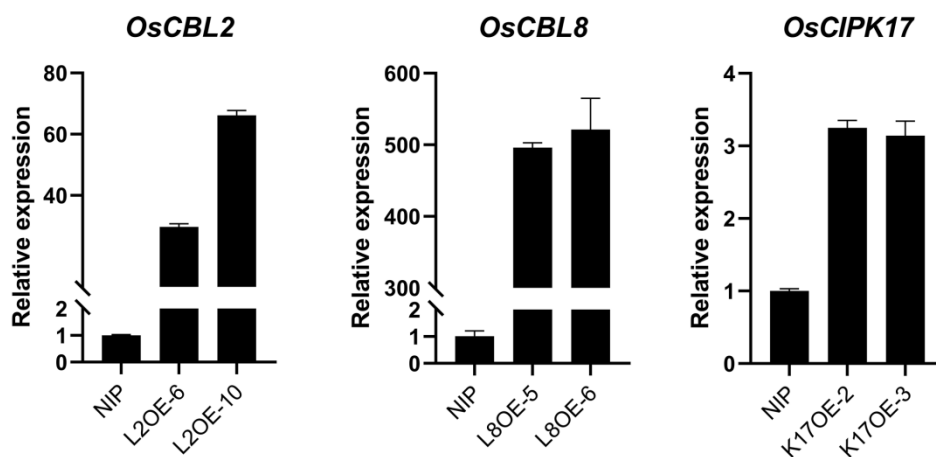

**Supplemental Figure. S20. Identification of mutant and overexpression lines.** (A) Multiple sequence alignment results of mutation sites in different lines.

These results were obtained by DNA sequencing. (B) The gene expression of overexpressed lines was verified by qPCR. Data are mean  $\pm$  SD from 3 biological replicates.

**Supplemental Table S1. Primers used in this study.**

| Gene             | Access number         | Sequence (5'-3')                                                                                         | Vector/Usage             |
|------------------|-----------------------|----------------------------------------------------------------------------------------------------------|--------------------------|
| <i>OsCBL2</i>    | <i>LOC_Os12g40510</i> | F:CTGATCTCAGAGGAGGACCTGCATATGGTGCA GTGTCTCGACGGG<br>R:GGCCGCTGCAGGTCGACGGATCCCGGTGTCATCGACCTGGGAATG      | pGBKT7                   |
| <i>OsCBL8</i>    | <i>LOC_Os02g18930</i> | F:CTGATCTCAGAGGAGGACCTGCATATGGGCTGTGTATCATCAAAGCAG<br>R:GGCCGCTGCAGGTCGACGGATCCCCAACTCTTCCTCACAAACTTCAGA | pGBKT7                   |
| <i>OsCIPK8</i>   | <i>LOC_Os01g35184</i> | F:TACGACGTACCAGATTACGCTCATATGGTGGGCGGAGGGGCG<br>R:TGCAGCTCGAGCTCGATGGATCCCGCTTCGATAGCCGCGA               | pGADT7                   |
| <i>OsCIPK17</i>  | <i>LOC_Os05g04550</i> | F:TACGACGTACCAGATTACGCTCATATGGTGAAGGGAGGGAGGGAG<br>R:TGCAGCTCGAGCTCGATGGATCCCCAAAGCGAACAGCGGCGT          | pGADT7                   |
| <i>OsCIPK23</i>  | <i>LOC_Os07g05620</i> | F:TACGACGTACCAGATTACGCCATATGAGCGTGTGCGGCGGG<br>R:TGCAGCTCGAGCTCGATGGATCCCGGTGACCTCCGATGCTG               | pGADT7                   |
| <i>OsCIPK24</i>  | <i>LOC_Os06g0370</i>  | F:TACGACGTACCAGATTACGCTCATATGGGAGGGGAGGAGGGAATG<br>R:TGCAGCTCGAGCTCGATGGATCCCGCATGTGGCTGTCCTCAG          | pGADT7                   |
| <i>OsCIPK27</i>  | <i>LOC_Os09g25100</i> | F:CATGGAGGCCGAATTCGCGGATGGAGGGGAAGGGGGTG<br>R:CTAGTTATGCGGCCGCTGCAGTCAGGTCGCCGCCGGCGA                    | pGADT7                   |
| <i>OsCBL2</i>    | <i>LOC_Os12g40510</i> | F:GCGACTAGTATGGTGCA GTGTCTCGACGG<br>R:GCGCTCGAGGGTGTATCGACCTGGG                                          | pSPYNE                   |
| <i>OsCBL8</i>    | <i>LOC_Os02g18930</i> | F:GCGACTAGTATGGGCTGTGTATCATCAAAGCAG<br>R:GCCTCGAGCAACTCTTCCTCACAAACTTCAGAG                               | pSPYCN                   |
| <i>OsCIPK17</i>  | <i>LOC_Os05g04550</i> | F:GCGACTAGTATGGTGAAGGGAGGGAGGGGA<br>R:GCGCTCGAGCAAAGCGAACAGCGGC                                          | pSPYCE                   |
| <i>OsCBL8</i>    | <i>LOC_Os02g18930</i> | F:GGTACCATGGGCTGTGTATCATCAAAGC<br>R:TCTAGATTACA ACTCTTCCTCACAAACTTCAG                                    | PWM101                   |
| <i>OsCIPK17</i>  | <i>LOC_Os05g04550</i> | F:CCATGGAGATGGTGAAGGGAGGGAGGGA<br>R:ACTAGTCAAAGCGAACAGCGGC                                               | PCM1307                  |
| <i>OsCBL8</i>    | <i>LOC_Os02g18930</i> | F:AAACGCCTTTGGGAGACAAG<br>R:AGAGCAAGCACCATTTCGTG                                                         | qPCR                     |
| <i>OsCIPK17</i>  | <i>LOC_Os05g04550</i> | F:CAGATCCCAAAGTGGCTTTCAC<br>R:GTGTGATTTGATCCCTGCCATG                                                     | qPCR                     |
| <i>OsACTIN-1</i> | <i>LOC_Os05g36290</i> | F:CTTCATAGGAATGGAAGCTGCGGGTA<br>R:CGACCACCTTGATCTTCATGCTGCTA                                             | qPCR                     |
| <i>OsCBL8</i>    | <i>LOC_Os02g18930</i> | F:GGGCTGTGTATCATCAAAGCAGTTC<br>R:GTAGAACTGTGCTTCTTCAGATAATGCC                                            | Mutant<br>identification |
| <i>OsCIPK17</i>  | <i>LOC_Os05g04550</i> | F:GCCAATCCGCTTCCATTATATTCTC<br>R:GGAGGCGAACCACGCAATTT                                                    | Mutant<br>identification |
| <i>OsAKI2</i>    | <i>LOC_Os03g63940</i> | F:CTGATCTCAGAGGAGGACCTGCATATGTTTTCCACGGCGCT<br>R:GGCCGCTGCAGGTCGACGCATCCCTTAGCTCAGCAAGAACTTGAAAAATATC    | pGBKT7                   |
| <i>OsDREB1B</i>  | <i>LOC_Os09g35010</i> | F:CTGATCTCAGAGGAGGACCTGCATATGGAGGTGGAGGAGGCGGCG<br>R:GGCCGCTGCAGGTCGACGGATCCCTTAGTAGCTACAGAGCGCATGTCCGA  | pGBKT7                   |
| <i>OsHAK5</i>    | <i>LOC_Os01g70490</i> | F:CTGATCTCAGAGGAGGACCTGCATATGACCGAGCCTCTGCACACA                                                          | pGBKT7                   |

|                 |                |                                                          |        |
|-----------------|----------------|----------------------------------------------------------|--------|
|                 |                | R:GGCCGCTGCAGGTCGACGGATCCCGATCTCGTACGTCATTCTACCCG        |        |
| <i>OsJAMYB</i>  | LOC_Os11g45740 | F:TACGACGTACCAGATTACGCTCATATGGAGATGGTGCTGCAGAGG          | pGBKT7 |
|                 |                | R:TGCAGCTCGAGCTCGATGGATCCCTTGCATCTTCCATATGTCCTCTAGACT    |        |
| <i>OsMKK6</i>   | LOC_Os01g32660 | F:CTGATCTCAGAGGAGGACCTGCATATGAGGGGAAGAAGCCACAC           | pGBKT7 |
|                 |                | R:GGCCACTGCAGGTCGACGGATCCCTTACTOGGATATATTCATTGGAGGTTCAAG |        |
| <i>OsNAC77</i>  | LOC_Os12g03050 | F:GCGACTAGTATGGTAGAGTCTACTACATCCCTTG                     | pGBKT7 |
|                 |                | R:GCGCTCGAGCTGTCGTGATATGTAATGATCCCC                      |        |
| <i>OsNADPH</i>  | LOC_Os09g28570 | F:CTGATCTCAGAGGAGGACCTGCATATGGAGCIGAAGCCCGGG             | pGBKT7 |
|                 |                | R:GGCCGCTGCAGGTCGACGGATCCCTATAGCTTAGCAAGGGTCTGACTGTATGA  |        |
| <i>OsPIIF</i>   | LOC_Os11g17790 | F:CTGATCTCAGAGGAGGACCTGCATATGAGCAGCACAAGTCGTCG           | pGBKT7 |
|                 |                | R:GGCCGCTGCAGGTCGACGGATCCCTATCCGATCTTGGGGACCTG           |        |
| <i>OsPP2C77</i> | LOC_Os12g09640 | F:GCGACTAGTATGCTCTGCGGCGTCGAG                            | pGBKT7 |
|                 |                | R:GCGCTCGAGTACCGCAAGAATGGTTGCAG                          |        |
| <i>OsTULP7</i>  | LOC_Os04g59130 | F:CTGATCTCAGAGGAGGACCTGCATATGTCTTTCCGCAGCATAGTTCGT       | pGBKT7 |
|                 |                | R:GGCCGCTGCAGGTCGACGGATCCCTTATTCACATGCCAGCTTGGTGTC       |        |
| <i>OsTULP11</i> | LOC_Os07g47110 | F:CTGATCTCAGAGGAGGACCTGCATATGTCTTTCAGGAGCGTGATCCAG       | pGBKT7 |
|                 |                | R:GGCCGCTGCAGGTCGACGGATCCCTCATTGCGACGCTATTTTGGTGTC       |        |
| <i>OsUP</i>     | LOC_Os08g29160 | F:CTGATCTCAGAGGAGGACCTGCATATGGCGCTCCATCTCACCACC          | pGBKT7 |
|                 |                | R:GGCCGCTGCAGGTCGACGGATCCCTCATTGCTTGGGAGACAATCTGATTGG    |        |
| <i>OsCIPK17</i> | LOC_Os05g04550 | F:GCGACTAGTATGGTGAAGGGAGGGAGGGA                          | pSPYCE |
|                 |                | R:GCGCTCGAGCAAAGCGAACAGCGGC                              |        |
| <i>OsCIPK17</i> | LOC_Os05g04550 | F:GCGACTAGTATGGTGAAGGGAGGGAGGGA                          | pSPYNE |
|                 |                | R:GCGGGTACCCAAAGCGAACAGCGGC                              |        |
| <i>OsJAMYB</i>  | LOC_Os11g45740 | F:GCGACTAGTATGGAGATGGTGCTGCAGAGG                         | pSPYNE |
|                 |                | R:GCGCTCGAGTTGCATCTTCCATATGTCCTCTAGACT                   |        |
| <i>OsNAC77</i>  | LOC_Os12g03050 | F:GCGACTAGTATGGTGGAGTCTACTACATCCCTTG TG                  | pSPYNE |
|                 |                | R:GCGCTCGAGCTGTCGTGATATGTAATGATCCCC                      |        |
| <i>OsPP2C77</i> | LOC_Os12g09640 | F:GCGACTAGTATGCTCTGCGGCGTCGAG                            | pSPYCE |
|                 |                | R:GCGCTCGAGTACCGCAAGAATGGTTGCAG                          |        |

---

**Supplemental Table S2. GSEA scores from OsCBL8 overexpression lines based on KEGG database.**

| Name                                             | Size | ES         | NES       | Nom p-val   | FDR q-val   |
|--------------------------------------------------|------|------------|-----------|-------------|-------------|
| KEGG_DITERPENOID_BIOSYNTHESIS                    | 20   | 0.67941135 | 1.7619492 | 0.002554278 | 0.08205975  |
| KEGG_PROTEASOME                                  | 59   | 0.5541656  | 1.7025065 | 0.001091703 | 0.09123118  |
| KEGG_PEROXISOME                                  | 74   | 0.5291559  | 1.6824982 | 0           | 0.076616526 |
| KEGG_PHENYLALANINE                               | 40   | 0.5556944  | 1.6188269 | 0.00116144  | 0.13585056  |
| KEGG_PROTEIN_PROCESSING_IN_ENDOPLASMIC_RETICULUM | 166  | 0.47049266 | 1.5788404 | 0           | 0.17810985  |
| KEGG_ETHER_LIPID_METABOLISM                      | 19   | 0.60639435 | 1.5491761 | 0.01858736  | 0.20417711  |
| KEGG_PLANT-PATHOGEN_INTERACTION                  | 76   | 0.49027136 | 1.5386949 | 0.003184713 | 0.19719848  |
| KEGG_ENDOCYTOSIS                                 | 79   | 0.4799361  | 1.5382137 | 0.006362672 | 0.1730454   |
| KEGG_FATTY_ACID_METABOLISM                       | 41   | 0.52421266 | 1.5364838 | 0.012542759 | 0.15664856  |
| KEGG_ABC_TRANSPORTERS                            | 8    | 0.7290811  | 1.5105956 | 0.023255814 | 0.18215041  |
| KEGG_SNARE_INTERACTIONS_IN_VESICULAR_TRANSPORT   | 35   | 0.5242221  | 1.4935495 | 0.030660378 | 0.19985627  |
| KEGG_GLYCEROPHOSPHOLIPID_METABOLISM              | 55   | 0.4841889  | 1.4934614 | 0.01430143  | 0.1834433   |
| KEGG_PENTOSE_PHOSPHATE_PATHWAY                   | 44   | 0.5027312  | 1.4878788 | 0.022753129 | 0.17855978  |
| KEGG_PHAGOSOME                                   | 72   | 0.4757875  | 1.4873545 | 0.006444683 | 0.16652119  |
| KEGG_ALPHA-LINOLENIC_ACID_METABOLISM             | 30   | 0.5282627  | 1.4707478 | 0.03301887  | 0.1829122   |



**Supplemental Table S3. GSEA scores from OsCIPK17 overexpression lines based on KEGG database.**

| Name                                           | Size | ES         | NES       | Nom p-val   | FDR q-val   |
|------------------------------------------------|------|------------|-----------|-------------|-------------|
| KEGG_PROTEASOME                                | 59   | 0.6443321  | 2.1190479 | 0           | 0           |
| KEGG_N-GLYCAN_BIOSYNTHESIS                     | 35   | 0.5766807  | 1.7446421 | 0.001148106 | 0.060925726 |
| KEGG_SNARE_INTERACTIONS_IN_VESICULAR_TRANSPORT | 33   | 0.56434804 | 1.6740121 | 0.002293578 | 0.10294486  |
| KEGG_SPHINGOLIPID_METABOLISM                   | 18   | 0.6392647  | 1.6730962 | 0.001251565 | 0.07868617  |
| KEGG_GLYCEROPHOSPHOLIPID_METABOLISM            | 56   | 0.507327   | 1.6561309 | 0.001075269 | 0.08030397  |
| KEGG_RNA_DEGRADATION                           | 81   | 0.48030847 | 1.6312877 | 0.001055966 | 0.08718655  |
| KEGG_GLUTATHIONE_METABOLISM                    | 52   | 0.5031679  | 1.6128656 | 0.001091703 | 0.09500396  |
| KEGG_CIRCADIAN_RHYTHM-PLANT                    | 22   | 0.57959163 | 1.5844105 | 0.012077294 | 0.11669597  |
| KEGG_ABC_TRANSPORTERS                          | 8    | 0.70115864 | 1.5540072 | 0.02710027  | 0.14223565  |
| KEGG_OXIDATIVE_PHOSPHORYLATION                 | 94   | 0.45119783 | 1.5535579 | 0.004140787 | 0.12850812  |
| KEGG_PHOSPHATIDYLINOSITOL_SIGNALING_SYSTEM     | 41   | 0.49944612 | 1.5328969 | 0.017563118 | 0.14523304  |
| KEGG_PHAGOSOME                                 | 72   | 0.4538683  | 1.4888152 | 0.008474576 | 0.21212564  |
| KEGG_UBIQUITIN_MEDIATED_PROTEOLYSIS            | 102  | 0.43443125 | 1.4881076 | 0.004149378 | 0.19743493  |
| KEGG_ETHER_LIPID_METABOLISM                    | 20   | 0.5442962  | 1.4816562 | 0.03789731  | 0.19484329  |
